# Supplementary material for: Reverse vaccinology-based identification of a novel surface lipoprotein that is an effective vaccine antigen against bovine infections caused by Pasteurella multocida
Source: PubMed Central journal article supplement (PMC10075479; doi:10.1371/journal.ppat.1011249), 2023-03-24
Supplement: ppat.1011249.s003.pdf [file ppat.1011249.s003.pdf]

**Table S2:** Bacterial recovery and detection of challenged animals. N denotes number of animals per group; – denotes not detected; + denotes detected; N/A denotes not applicable (no animals fell within this group); ND denotes no data.

| Formulation                | HS-PmSLP<br>+AIOH |      | HS-PmSLP<br>+Gel02+Poly(I:C) |      | Bacterin<br>+AlK(SO <sub>4</sub> ) <sub>2</sub> |      | Adjuvant |      |
|----------------------------|-------------------|------|------------------------------|------|-------------------------------------------------|------|----------|------|
|                            | Alive             | Dead | Alive                        | Dead | Alive                                           | Dead | Alive    | Dead |
| N                          | 7                 | 1    | 6                            | 2    | 8                                               | 0    | 0        | 8    |
| <b>Bacterial Recovery</b>  |                   |      |                              |      |                                                 |      |          |      |
| Blood                      | -                 | +    | -                            | +    | -                                               | N/A  | N/A      | +    |
| <b>Molecular Detection</b> |                   |      |                              |      |                                                 |      |          |      |
| Blood                      | -                 | +    | -                            | +    | -                                               | N/A  | N/A      | +    |
| Lung                       | ND                | +    | ND                           | +    | ND                                              | N/A  | N/A      | +    |
| Liver                      | ND                | +    | ND                           | +    | ND                                              | N/A  | N/A      | +    |
| Kidney                     | ND                | +    | ND                           | +    | ND                                              | N/A  | N/A      | +    |
| Spleen                     | ND                | +    | ND                           | +    | ND                                              | N/A  | N/A      | +    |
