# Supplementary material for: Reverse vaccinology-based identification of a novel surface lipoprotein that is an effective vaccine antigen against bovine infections caused by Pasteurella multocida
Source: PubMed Central journal article supplement (PMC10075479; doi:10.1371/journal.ppat.1011249), 2023-03-24
Supplement: ppat.1011249.s005.pdf [file ppat.1011249.s005.pdf]

**Supplemental Material:**

**Protein Sequences of PmSLP from HS causing strains isolated from NVI-Ethiopia.**

>NVI\_HS12\_Sequence\_2019

MKYFDTKKSLPVLCSLLITACSGGGGGNNNVPHPPVEKRTVATTQQVAAKPTPPSESLVKRVLNSENPPS  
RESEKKASQTPPQTDSAQSTIQSTPAVIPDRNTSLTSKKGQIQMSPEWIGKEEKKYAQYSWEHTPESIPVFKLIE  
NNQYKYVDDKYFTLESINLNLTKENQVKEGSYQFSLDGSVYGHYSSNDGIHPEYNFVIAFDKNREYTLKDIT  
AEYYNSEGFNYAISDRMKGDIWQVGDVRLFYTNNGSVHGEIIEVNDGSKTALFRFENTADRNPQIVIVPER  
DNRHGLSPRGDRMIMDMHFINGSDGEKYKYVVGHGNSDRYYGTLFATKKDKE

>NVI\_HS11\_Sequence\_2019

MKYFDTKKSLPVLCSLLITACSGGGGGNNNVPHPPVEKRTVATTQQVAAKPTPPSESLVKRVLNSENPPS  
RESEKKASQTPPQTDSAQSTIQSTPAVIPDRNTSLTSKKGQIQMSPEWIGKEEKKYAQYSWEHTPESIPVFKLIE  
NNQYKYVDDKYFTLESINLNLTKENQVKEGSYQFSLDGSVYGHYSSNDGIHPEYNFVIAFDKNREYTLKDIT  
AEYYNSEGFNYAISDRMKGDIWQVGDVRLFYTNNGSVHGEIIEVNDGSKTALFRFENTADRNPQIVIVPER  
DNRHGLSPRGDRMIMDMHFINGSDGEKYKYVVGHGNSDRYYGTLFATKKDKE

>NVI\_HS10\_Sequence\_2019

MKYFDTKKSLPVLCSLLITACSGGGGGNNNVPHPPVEKRTVATTQQVAAKPTPPSESLVKRVLNSENPPS  
RESEKKASQTPPQTDSAQSTIQSTPAVIPDRNTSLTSKKGQIQMSPEWIGKEEKKYAQYSWEHTPESIPVFKLIE  
NNQYKYVDDKYFTLESINLNLTKENQVKEGSYQFSLDGSVYGHYSSNDGIHPEYNFVIAFDKNREYTLKDIT  
AEYYNSEGFNYAISDRMKGDIWQVGDVRLFYTNNGSVHGEIIEVNDGSKTALFRFENTADRNPQIVIVPER  
DNRHGLSPRGDRMIMDMHFINGSDGEKYKYVVGHGNSDRYYGTLFATKKDKE

>NVI\_HS7\_Sequence\_2019

MKYFDTKKSLPVLCSLLITACSGGGGGNNNVPHPPVEKRTVATTQQVAAKPTPPSESLVKRVLNSENPPS  
RESEKKASQTPPQTDSAQSTIQSTPAVIPDRNTSLTSKKGQIQMSPEWIGKEEKKYAQYSWEHTPESIPVFKLIE  
NNQYKYVDDKYFTLESINLNLTKENQVKEGSYQFSLDGSVYGHYSSNDGIHPEYNFVIAFDKNREYTLKDIT  
AEYYNSEGFNYAISDRMKGDIWQVGDVRLFYTNNGSVHGEIIEVNDGSKTALFRFENTADRNPQIVIVPER  
DNRHGLSPRGDRMIMDMHFINGSDGEKYKYVVGHGNSDRYYGTLFATKKDKE

>NVI\_HS5\_Sequence\_2019\_partial

MSPEWIGKEEKKYAQYSWEHTPESIPVFKLIENNQYKYVDDKYFTLESINLNLTKENQVKEGSYQFSLDGSVY  
YGHYSSNDGIHPEYNFVIAFDKNREYTLKDITAEYYNSEGFNYAISDRMKGDIWQVGDVRLFYTNNGSVHGE  
IIEVNDGSKTALFRFENTADRNPQIVIVPERDNRHGLSPRGDRMIMDMHFINGSDGEKYKYVVGHGNSDR  
YYGTLFATKKDKE

>NVI\_HS5\_Sequence\_2019

MKYFDTKKSLPVLCSLLITACSGGGGGNNNVPHPPVEKRTVATTQQVAAKPTPPSESLVKRVLNSENPPS  
RESEKKASQTPPQTDSAQSTIQSTPAVIPDRNTSLTSKKGQIQMSPEWIGKEEKKYAQYSWEHTPESIPVFKLIE  
NNQYKYVDDKYFTLESINLNLTKENQVKEGSYQFSLDGSVYGHYSSNDGIHPEYNFVIAFDKNREYTLKDIT  
AEYYNSEGFNYAISDRMKGDIWQVGDVRLFYTNNGSVHGEIIEVNDGSKTALFRFENTADRNPQIVIVPER  
DNRHGLSPRGDRMIMDMHFINGSDGEKYKYVVGHGNSDRYYGTLFATKKDKE

>NVI\_HS3\_Sequence\_2019

MKYFDTKKSLPVLCSLLITACSGGGGGNNNVPHPVVEKRTVATTQQVAAKPTPPSESLVKRVLNSENPPS  
RESEKKASQTPPQTDSAQSTIQSTPAVIPDRTNSLTSSKKGQIQMSPEWIGKEEKKYAQYSWEHTPESIPVFKLIE  
NNQYKYVDDKYFTLESINLNLTKENQVKEGSYQFSLDSGVVYGHYSSNDGIHPEYNFVIAFDKNREYTLKDIT  
AEYYNSEGFNYAISDRMKGDYIWQVGDVRLFYTNGSVHGEIIEVNDGSKTALFRFENTADRPNPNQIVIVPER  
DNRHGLSPRGDRMIMDMHFINGS DGEKYKYVVGHGNSDRYYGTLFATKKDKE

>NVI\_HS2\_Sequence\_2019

MKYFDTKKSLPVLCSLLITACSGGGGGNNNVPHPVVEKRTVATTQQVAAKPTPPSESLVKRVLNSENPPS  
RESEKKASQTPPQTDSAQSTIQSTPAVIPDRTNSLTSSKKGQIQMSPEWIGKEEKKYAQYSWEHTPESIPVFKLIE  
NNQYKYVDDKYFTLESINLNLTKENQVKEGSYQFSLDSGVVYGHYSSNDGIHPEYNFVIAFDKNREYTLKDIT  
AEYYNSEGFNYAISDRMKGDYIWQVGDVRLFYTNGSVHGEIIEVNDGSKTALFRFENTADRPNPNQIVIVPER  
DNRHGLSPRGDRMIMDMHFINGS DGEKYKYVVGHGNSDRYYGTLFATKKDKE

>NVI\_HS1\_Sequence\_2019

MKYFDTKKSLPVLCSLLITACSGGGGGNNNVPHPVVEKRTVATTQQVAAKPTPPSESLVKRVLNSENPPS  
RESEKKASQTPPQTDSAQSTIQSTPAVIPDRTNSLTSSKKGQIQMSPEWIGKEEKKYAQYSWEHTPESIPVFKLIE  
NNQYKYVDDKYFTLESINLNLTKENQVKEGSYQFSLDSGVVYGHYSSNDGIHPEYNFVIAFDKNREYTLKDIT  
AEYYNSEGFNYAISDRMKGDYIWQVGDVRLFYTNGSVHGEIIEVNDGSKTALFRFENTADRPNPNQIVIVPER  
DNRHGLSPRGDRMIMDMHFINGS DGEKYKYVVGHGNSDRYYGTLFATKKDKE
